# Supplementary material for: Are the rates of dexter transfer in TADF hyperfluorescence systems optically accessible?
Source: Royal Society of Chemistry journal article supplement (doi:10.1039/d0mh01666g), 2021-01-01
Supplement: d0mh01666g2.xlsx [file d0mh01666g2.xlsx]

## Sheet: Sheet1
										[FE]	data	model
										0	0.85	0.847458
										0.1		0.741665
										0.2		0.690159
										0.3		0.662281
										0.4		0.646562
										0.5		0.637773
										0.6		0.633204
										0.7		0.631326
										0.8		0.631218
										0.9		0.632298
	parameter									1	0.85	0.634184
										1.1		0.636617
	kf	15000000								1.2		0.63942
	phi_FE	0.85								1.3		0.642466
	kisc	32000000								1.4		0.645666
	krisc	980000								1.5		0.648956
	kfret	30000000								1.6		0.652289
	kdex	1000000								1.7		0.655629
	kNR	2700000								1.8		0.658952
										1.9		0.662241
										2	0.85	0.66548
										2.1		0.668662
										2.2		0.671779
										2.3		0.674827
										2.4		0.677804
										2.5		0.680707
										2.6		0.683537
										2.7		0.686292
										2.8		0.688975
										2.9		0.691585
										3	0.85	0.694125
										3.1		0.696596
										3.2		0.698999
										3.3		0.701337
										3.4		0.703611
										3.5		0.705823
										3.6		0.707975
										3.7		0.710069
										3.8		0.712107
										3.9		0.714091
										4	0.85	0.716022
										4.1		0.717903
										4.2		0.719734
										4.3		0.721519
										4.4		0.723257
										4.5		0.724952
										4.6		0.726604
										4.7		0.728215
										4.8		0.729786
										4.9		0.731319
										5	0.85	0.732814
